# Supplementary material
Source: publisher figshare collection journal article supplement (https://asha.figshare.com/ndownloader/files/31293760)
Supplement: Supplementary file 1 [file 31293760]

## Supplemental Material S1. Developmental Questionnaire.

Child's name: \_\_\_\_\_

Date of birth: \_\_\_\_\_

Date form was completed: \_\_\_\_\_

**When did your child begin to do the following? Please state the age in months. Please place an X in the Not yet column if your child does not currently have the skill listed.**

| Skill                           | Age (months) | Not yet |
|---------------------------------|--------------|---------|
| Roll                            |              |         |
| Sit on own                      |              |         |
| Crawl                           |              |         |
| Pull self up along furniture    |              |         |
| Walk along furniture            |              |         |
| Walk on own                     |              |         |
| Coo (vocalize, vocal play)      |              |         |
| Babble (random sounds)          |              |         |
| 1 <sup>ST</sup> meaningful word |              |         |

**Please choose the answer that best describes the frequency with which you child does the following behaviors. Please place an X in the appropriate box. If you have not observed the behavior, or the item does not apply to your child, please put an X in the Never column.**

**Please use the following key when responding.**

**Always:** When presented with the opportunity your child always responds in this manner.

**Frequently:** responds this way about 75% of the time

**Occasionally:** responds this way about 50% of the time

**Seldom:** responds this way about 25% of the time

**Never:** responds this way 0% of the time

| Item | Oral Sensitivity                    | Always | Frequently | Occasionally | Seldom | Never |
|------|-------------------------------------|--------|------------|--------------|--------|-------|
| 1    | Suck thumb                          |        |            |              |        |       |
| 2    | Use pacifier                        |        |            |              |        |       |
| 3    | Put hands in mouth                  |        |            |              |        |       |
| 4    | Put toys in mouth                   |        |            |              |        |       |
| 5    | Gag with things in his/her mouth    |        |            |              |        |       |
| 6    | Excessive drooling without teething |        |            |              |        |       |

**When did your child begin to eat the following foods? Please be as specific as possible. Circle Y for Yes if there were problems starting these foods and N for No if there were no problems starting these foods.**

**Age (months) started foods:**

**Problems (describe):**

Bottle \_\_\_\_\_

Y N \_\_\_\_\_

Cereal by spoon \_\_\_\_\_

Y N \_\_\_\_\_

Fruits/vegetables \_\_\_\_\_

Y N \_\_\_\_\_

Stage 3 (smooth) \_\_\_\_\_

Y N \_\_\_\_\_

Stage 3 (lumpy/textured) \_\_\_\_\_

Y N \_\_\_\_\_

Finger foods \_\_\_\_\_

Y N \_\_\_\_\_

Table foods \_\_\_\_\_

Y N \_\_\_\_\_

Cup \_\_\_\_\_

Y N \_\_\_\_\_

**When healthy (not during illness), has your child ever had problems with the following items or does your child currently have problems with the following items during mealtime? Please mark an X in the boxes that described/s your child.**

| Item                                  | In the past | Now | Does not apply |
|---------------------------------------|-------------|-----|----------------|
| Slow feeder                           |             |     |                |
| Takes small quantities                |             |     |                |
| Gagging                               |             |     |                |
| Coughing                              |             |     |                |
| Choking                               |             |     |                |
| Refuses bottle                        |             |     |                |
| Refuses formula                       |             |     |                |
| Refuses cup                           |             |     |                |
| Refuses foods from spoon              |             |     |                |
| Refuses solids                        |             |     |                |
| Difficulty chewing solids             |             |     |                |
| Difficult to get into feeding routine |             |     |                |
| Feeds on demand                       |             |     |                |
| Does not eat enough                   |             |     |                |
| Refuses to eat food offered           |             |     |                |
| Choosy or picky about food            |             |     |                |
| Definite likes and dislikes           |             |     |                |
| Refuses food with lumps or texture    |             |     |                |

**Please place an X in the boxes which best describe your child's current feeding status.**

**Please see the following examples\*.**

**Stage 3 textured:** puree with pieces of solids or lumps

**Adult puree:** applesauce, pudding, yogurt etc.

**Dissolvable solids:** foods that melt in your mouth with minimal chewing (i.e., graham crackers, butter crackers, Gerber puffs, Cheeto puffs)

**Soft / well-cooked:** soft vegetables, meats etc.

**Crunchy:** crisp crackers, chips etc.

**General table food:** foods that the parents eat cut into small pieces

| <b>Food item</b>                    | <b>Yes</b> | <b>No</b> | <b># of times given per day</b> |
|-------------------------------------|------------|-----------|---------------------------------|
| <b>LIQUIDS</b>                      |            |           |                                 |
| Breast                              |            |           |                                 |
| Bottle                              |            |           |                                 |
| Formula                             |            |           |                                 |
| Breast milk                         |            |           |                                 |
| Juice                               |            |           |                                 |
| <b>PUREES</b>                       |            |           |                                 |
| Stage 1                             |            |           |                                 |
| Stage 2                             |            |           |                                 |
| Stage 3 smooth                      |            |           |                                 |
| Stage 3 textured*                   |            |           |                                 |
| Adult puree*                        |            |           |                                 |
| <b>SOLIDS</b>                       |            |           |                                 |
| Dissolvable*                        |            |           |                                 |
| Soft / well-cooked*                 |            |           |                                 |
| Crunchy*                            |            |           |                                 |
| General table food*                 |            |           |                                 |
| <b>CUP</b>                          |            |           |                                 |
| Sipper cup (not spill-proof)        |            |           |                                 |
| Sipper cup with valve (spill-proof) |            |           |                                 |
| Open / regular                      |            |           |                                 |
| Straw                               |            |           |                                 |
